# Supplementary material
Source: publisher figshare collection journal article supplement (https://rs.figshare.com/ndownloader/files/23890669)
Supplement: Supplementary file 1 [file 23890669]

## Sheet: Sheet1
Core	Sedment depth	Fe (wt%) XRF	P (wt%) XRF	Al (wt%) XRF	P/Al (%/%)	P/Fe (%/%)	TOC (wt%)	TOC/P (%/%)
19-19	0.5	4.1689	0.122623	6.92758	0.0177007	0.0294138	1.61116	13.1391
19-19	1.5
19-19	2.5	5.57486	0.24481	7.23983	0.0338144	0.0439132	1.57978	6.45306
19-19	4.5	4.9733	0.153606	7.48856	0.0205121	0.0308862	1.45823	9.49327
19-19	6.5	4.53963	0.0964403	7.66321	0.0125848	0.0212441	1.57572	16.3388
19-19	8.5	4.036	0.0789851	7.50444	0.0105251	0.0195701	1.50713	19.0812
19-19	10.5	4.18989	0.0794214	7.59441	0.0104579	0.0189555	1.43495	18.0676
19-19	14.5	4.04999	0.0785487	7.75318	0.0101312	0.0193948	1.45285	18.4961
19-19	18.5	3.93807	0.0768032	7.71084	0.00996041	0.0195027	1.42882	18.6037
19-19	22.5	3.98004	0.0768032	7.82198	0.00981889	0.0192971	1.42283	18.5257
19-19	26.5	3.85414	0.0737485	7.5309	0.00979278	0.0191349	1.27155	17.2417
19-19	30.5	4.18989	0.0763668	7.75847	0.00984302	0.0182265	1.13558	14.8701
19-19	34.5	3.98704	0.0733121	7.40918	0.00989477	0.0183876	1.26885	17.3075
27-15	0.5	2.61606	0.0781123	5.22876	0.014939	0.0298588	0.903198	11.5628
27-15	2.5	2.8259	0.0711302	5.3399	0.0133205	0.0251708	0.560434	7.87899
27-15	4.5	2.63005	0.0689483	5.30286	0.0130021	0.0262156	0.580256	8.41581
27-15	6.5	2.53911	0.0624026	5.27639	0.0118267	0.0245765	0.452168	7.24599
27-15	8.5	2.686	0.0641481	5.37166	0.011942	0.0238823	0.604734	9.42715
27-15	10.5	3.72123	0.0916401	6.34543	0.0144419	0.0246263	0.519617	5.67019
27-15	14.5	4.00802	0.0964403	7.01755	0.0137427	0.0240618	0.759577	7.87614
27-15	18.5	3.70025	0.0885855	6.59417	0.0134339	0.0239404	0.572732	6.4653
27-15	22.5	4.25284	0.0898946	7.61029	0.0118122	0.0211375	0.467376	5.19915
39-5	0.5	4.35776	0.0964403	6.74765	0.0142924	0.0221307	1.2442	12.9012
39-5	2.5	4.60957	0.100368	7.20278	0.0139346	0.0217738	1.27735	12.7267
39-5	4.5	4.63056	0.0990586	7.17632	0.0138035	0.0213924	1.22293	12.3455
39-5	6.5	4.76346	0.101677	7.50444	0.0135489	0.0213452	1.14926	11.303
39-5	8.5	4.82641	0.102986	7.59441	0.0135608	0.021338	1.20474	11.6981
39-5	10.5	4.81942	0.101677	7.56266	0.0134446	0.0210973	1.03585	10.1877
39-5	14.5	4.81242	0.0999314	7.50444	0.0133163	0.0207653	0.976144	9.76815
39-5	18.5	4.86139	0.0990586	7.63675	0.0129713	0.0203766	0.925371	9.34165
39-5	22.5	4.93134	0.101241	7.78493	0.0130047	0.02053	1.19865	11.8396
39-5	26.5	4.90336	0.0981859	7.68438	0.0127773	0.0200242	0.939323	9.56678
39-5	30.5	4.89636	0.099495	7.67379	0.0129656	0.0203202	0.804553	8.08637
39-5	34.5	5.00828	0.0986222	7.88548	0.0125068	0.0196918	0.85773	8.69713
46-15	0.5	4.12693	0.0920765	6.76352	0.0136137	0.0223111	1.11818	12.1441
46-15	1.5	4.34377	0.0955676	7.11281	0.013436	0.0220011
46-15	2.5	4.46968	0.0981859	7.36684	0.0133281	0.0219671	1.10728	11.2773
46-15	4.5	4.49066	0.0968767	7.28217	0.0133033	0.0215729	1.04254	10.7615
46-15	6.5	4.64455	0.0990586	7.63675	0.0129713	0.0213279	0.92223	9.30994
46-15	8.5	4.62356	0.0981859	7.64204	0.0128481	0.021236	0.881319	8.97602
46-15	10.5	4.65854	0.0960039	7.6685	0.0125193	0.0206082	0.828542	8.63029
46-15	14.5	4.66553	0.0951312	7.81668	0.0121703	0.0203902	0.752484	7.90996
46-15	18.5	4.55362	0.0907674	7.56266	0.012002	0.019933	0.708311	7.80359
46-15	22.5	4.68652	0.0916401	7.72142	0.0118683	0.019554	0.687712	7.50449
46-15	26.5	4.69351	0.0907674	7.85373	0.0115572	0.0193389	0.605939	6.67574
46-15	30.5	4.77745	0.0912037	8.0125	0.0113827	0.0190905	0.595022	6.52409
56-05	0.5	3.57434	0.0837853	6.42482	0.0130409	0.0234407	0.840233	10.0284
56-05	1.5	4.13393	0.141388	7.02284	0.0201325	0.0342018
56-05	2.5	4.50465	0.093822	7.1922	0.013045	0.0208278	0.858236	9.14749
56-05	4.5	4.21087	0.0885855	7.3298	0.0120857	0.0210373	0.817514	9.22854
56-05	6.5	4.23885	0.0877127	7.54678	0.0116225	0.0206926	0.773577	8.81944
56-05	8.5	4.42771	0.0890218	7.80081	0.0114119	0.0201056	0.686693	7.71376
56-05	10.5	4.54662	0.0833489	7.99662	0.010423	0.018332	0.525392	6.30353
56-05	14.5	4.13393	0.0850944	7.56795	0.0112441	0.0205844	0.423097	4.97209
56-05	18.5	4.83341	0.090331	7.52561	0.0120031	0.0186889	0.401155	4.44095
56-05	22.5	4.53263	0.0750576	8.39354	0.00894231	0.0165594	0.521454	6.94738
56-05	26.5	3.72123	0.0545477	7.38272	0.00738856	0.0146585	0.323847	5.93695
